# Supplementary material for: Post-Harvest LED Light Irradiation Affects Firmness, Bioactive Substances, and Amino Acid Compositions in Chili Pepper (Capsicum annum L.)
Source: MDPI journal article supplement (doi:10.3390/foods11172712), 2022-09-05
Supplement: s1 [file s1]

Table S1. Effect of light quality on the amino acid composition and contents (g kg<sup>-1</sup>) in fruits of three pepper cultivars.

|                   | Hangjiao-2     |                |                |                | Xinxiang-2     |                 |                |                | P1622          |                |                 |                |
|-------------------|----------------|----------------|----------------|----------------|----------------|-----------------|----------------|----------------|----------------|----------------|-----------------|----------------|
|                   | Dark           | White          | Red            | Blue           | Dark           | White           | Red            | Blue           | Dark           | White          | Red             | Blue           |
| Asp <sup>BD</sup> | 2.6<br>±0.2b   | 2.1<br>±0.1c   | 4.5<br>±0.3a   | 4.4<br>±0.1a   | 3.3<br>±0.2a   | 2.7<br>±0.1b    | 2.4<br>±0.1c   | 3.4<br>±0.1a   | 3.4<br>±0.2a   | 2.6<br>±0.1b   | 2.6<br>±0.1b    | 3.2<br>±0.2a   |
| Thr <sup>A</sup>  | 1.9<br>±0.1d   | 2.1<br>±0.1c   | 3.0<br>±0.2a   | 2.8<br>±0.1b   | 1.9<br>±0.1ab  | 1.9<br>±0.1b    | 1.9<br>±0.1b   | 2.0<br>±0.1a   | 1.9<br>±0.1a   | 1.6<br>±0.1b   | 1.7<br>±0.1ab   | 1.6<br>±0.2b   |
| Ser <sup>BE</sup> | 2.3<br>±0.1d   | 2.4<br>±0.1c   | 3.3<br>±0.2a   | 3.1<br>±0.2b   | 2.2<br>±0.1a   | 1.9<br>±0.1b    | 1.8<br>±0.1b   | 2.2<br>±0.2a   | 2.2<br>±0.1a   | 1.9<br>±0.1b   | 1.9<br>±0.1b    | 1.9<br>±0.1b   |
| Glu <sup>BD</sup> | 4.5<br>±0.3b   | 4.7<br>±0.2b   | 6.6<br>±0.5a   | 6.4<br>±0.4a   | 4.7<br>±0.3a   | 3.9<br>±0.2b    | 3.6<br>±0.2c   | 4.8<br>±0.4a   | 4.6<br>±0.2a   | 3.8<br>±0.2c   | 4.2<br>±0.2b    | 4.0<br>±0.2bc  |
| Pro <sup>BE</sup> | 2.0<br>±0.1c   | 2.5<br>±0.1b   | 3.1<br>±0.3a   | 3.0<br>±0.2a   | 2.1<br>±0.1b   | 2.3<br>±0.1b    | 2.6<br>±0.2a   | 2.3<br>±0.1b   | 2.1<br>±0.1a   | 1.9<br>±0.1b   | 1.9<br>±0.1b    | 1.9<br>±0.1b   |
| Gly <sup>BE</sup> | 2.2<br>±0.1c   | 2.7<br>±0.2b   | 3.4<br>±0.2a   | 3.2<br>±0.3a   | 2.3<br>±0.1a   | 2.3<br>±0.2a    | 2.4<br>±0.2a   | 2.4<br>±0.1a   | 2.2<br>±0.1a   | 2.0<br>±0.1b   | 2.0<br>±0.1b    | 1.9<br>±0.2b   |
| Ala <sup>BE</sup> | 2.5<br>±0.2d   | 2.9<br>±0.2c   | 3.8<br>±0.3a   | 3.6<br>±0.2b   | 2.5<br>±0.1ab  | 2.3<br>±0.1b    | 2.3<br>±0.1b   | 2.6<br>±0.2a   | 2.5<br>±0.1a   | 2.1<br>±0.1b   | 2.3<br>±0.2b    | 2.1<br>±0.1b   |
| Val <sup>A</sup>  | 2.0<br>±0.1c   | 2.4<br>±0.1b   | 2.9<br>±0.2a   | 2.8<br>±0.2a   | 2.0<br>±0.1a   | 1.9<br>±0.1a    | 1.8<br>±0.1a   | 2.0<br>±0.1a   | 1.8<br>±0.1a   | 1.6<br>±0.1b   | 1.7<br>±0.1b    | 1.7<br>±0.1b   |
| Met <sup>A</sup>  | 0.50<br>±0.03d | 0.54<br>±0.04c | 0.85<br>±0.06a | 0.62<br>±0.04b | 0.51<br>±0.02b | 0.48<br>±0.03c  | 0.49<br>±0.02c | 0.55<br>±0.02a | 0.53<br>±0.02a | 0.41<br>±0.03b | 0.38<br>±0.02bc | 0.36<br>±0.02c |
| Ile <sup>A</sup>  | 1.5<br>±0.1c   | 1.8<br>±0.1b   | 2.3<br>±0.2a   | 2.2<br>±0.1a   | 1.5<br>±0.1a   | 1.6<br>±0.1a    | 1.5<br>±0.1a   | 1.6<br>±0.2a   | 1.4<br>±0.1a   | 1.3<br>±0.1a   | 1.3<br>±0.1a    | 1.4<br>±0.1a   |
| Leu <sup>A</sup>  | 3.7<br>±0.2c   | 4.6<br>±0.4b   | 5.7<br>±0.3a   | 5.5<br>±0.4a   | 3.8<br>±0.3a   | 3.8<br>±0.3a    | 3.8<br>±0.2a   | 4.0<br>±0.3a   | 3.6<br>±0.2a   | 3.3<br>±0.1b   | 3.3<br>±0.1b    | 3.2<br>±0.1b   |
| Tyr <sup>BF</sup> | 1.7<br>±0.1c   | 2.1<br>±0.1b   | 2.3<br>±0.2a   | 2.4<br>±0.1a   | 1.7<br>±0.1b   | 1.7<br>±0.1a    | 1.5<br>±0.1c   | 1.7<br>±0.1a   | 1.5<br>±0.1a   | 1.4<br>±0.1a   | 1.5<br>±0.1a    | 1.4<br>±0.1a   |
| Phe <sup>BF</sup> | 2.3<br>±0.1c   | 2.9<br>±0.2b   | 3.4<br>±0.2a   | 3.3<br>±0.2a   | 2.3<br>±0.2a   | 2.4<br>±0.1a    | 2.4<br>±0.2a   | 2.5<br>±0.2a   | 2.2<br>±0.1a   | 2.0<br>±0.1b   | 2.1<br>±0.1b    | 2.0<br>±0.1b   |
| His <sup>BC</sup> | 0.43<br>±0.03c | 0.28<br>±0.03d | 1.3<br>±0.1a   | 1.0<br>±0.1b   | 0.72<br>±0.04b | 0.75a<br>±0.03b | 0.79<br>±0.03a | 0.67<br>±0.03c | 0.99<br>±0.05a | 0.53<br>±0.04c | 0.44<br>±0.04d  | 0.83<br>±0.06b |
| Lys <sup>A</sup>  | 2.8<br>±0.2c   | 3.4<br>±0.2b   | 4.2<br>±0.3a   | 4.1<br>±0.3a   | 2.8<br>±0.2b   | 2.7<br>±0.2b    | 2.4<br>±0.1c   | 2.9<br>±0.1a   | 2.6<br>±0.1a   | 2.4<br>±0.1b   | 2.5<br>±0.1b    | 2.4<br>±0.1b   |
| Arg <sup>BC</sup> | 2.7<br>±0.2c   | 3.0<br>±0.2b   | 3.4<br>±0.2a   | 3.5<br>±0.3a   | 2.6<br>±0.1b   | 2.2<br>±0.2c    | 1.9<br>±0.1c   | 2.9<br>±0.2a   | 2.8<br>±0.2a   | 2.5<br>±0.1b   | 2.3<br>±0.1b    | 2.7<br>±0.1a   |
| Cys <sup>B</sup>  | 0.14<br>±0.01b | 0.14<br>±0.01b | 0.21<br>±0.01a | 0.20<br>±0.01a | 0.16<br>±0.01b | 0.17<br>±0.01ab | 0.15<br>±0.01b | 0.18<br>±0.01a | 0.19<br>±0.02a | 0.15<br>±0.01c | 0.14<br>±0.01d  | 0.16<br>±0.01b |

Note: Amino acids are represented by the 3-letter abbreviation code. A, Essential amino acid; B, Non-essential amino acid; C, Children essential amino acid; D, Monosodium glutamate-like amino acid; E, Sweet amino acid; F, Aromatic amino acid. The results are shown as the mean ± SE of triplicate samples. Means denoted by the same letter did not differ significantly at  $p < 0.05$  according to Tukey's test.
